# Supplementary material for: High metal loaded Cu(i)N3 single-atom catalysts: superior methane conversion activity and selectivity under mild conditions
Source: Royal Society of Chemistry journal article supplement (doi:10.1039/d3ta02450d), 2023-01-01
Supplement: d3ta02450d1.pdf [file d3ta02450d1.pdf]

## Supplementary Material

**High metal loaded Cu(I)N<sub>3</sub> single-atom catalysts: superior methane conversion activity and selectivity under mild conditions**

Hyesung Lee and Sang-Yup Lee\*

Department of Chemical and Biomolecular Engineering, Yonsei University, Seoul  
03722 Republic of Korea

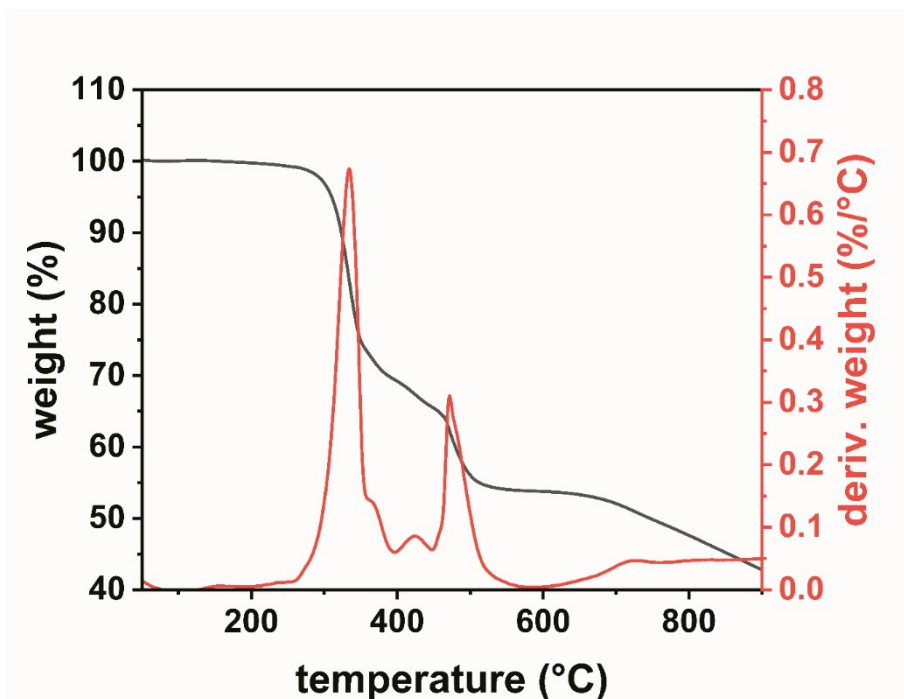

**Figure S1.** TGA and 1<sup>st</sup> derivation profiles of Cu(bIm)<sub>2</sub>.

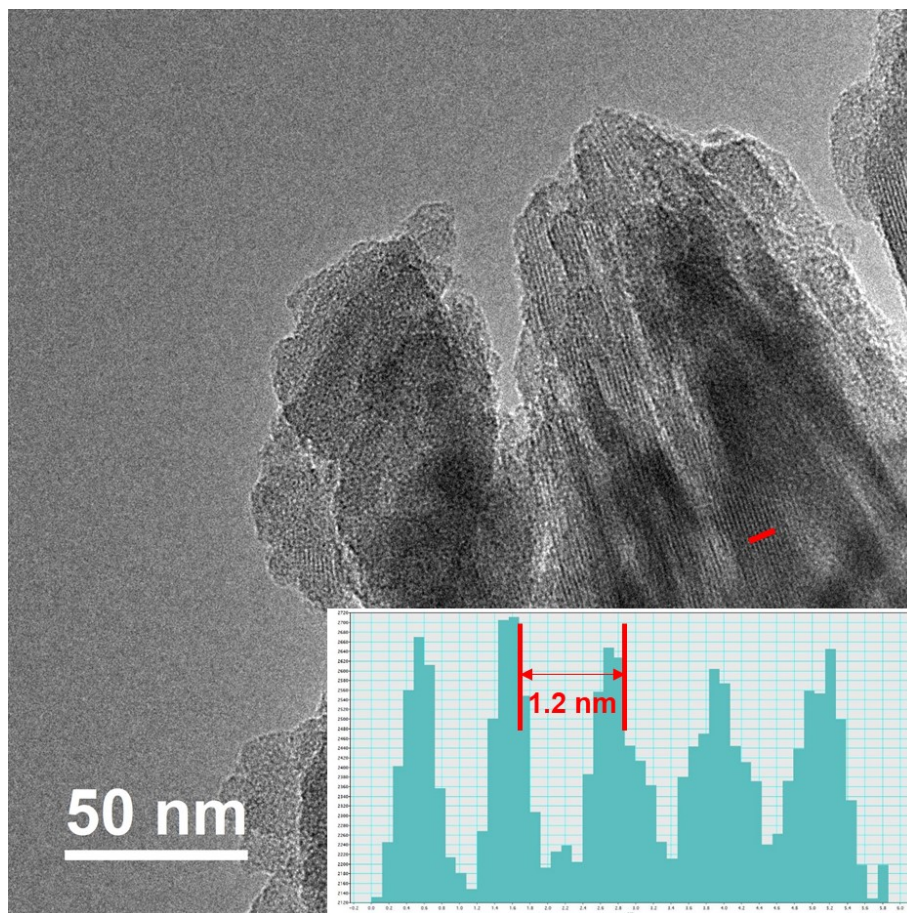

**Figure S2.** TEM image of the CuNC-600 showing carbon layers (inset: intensity profile of the region marked in red line).

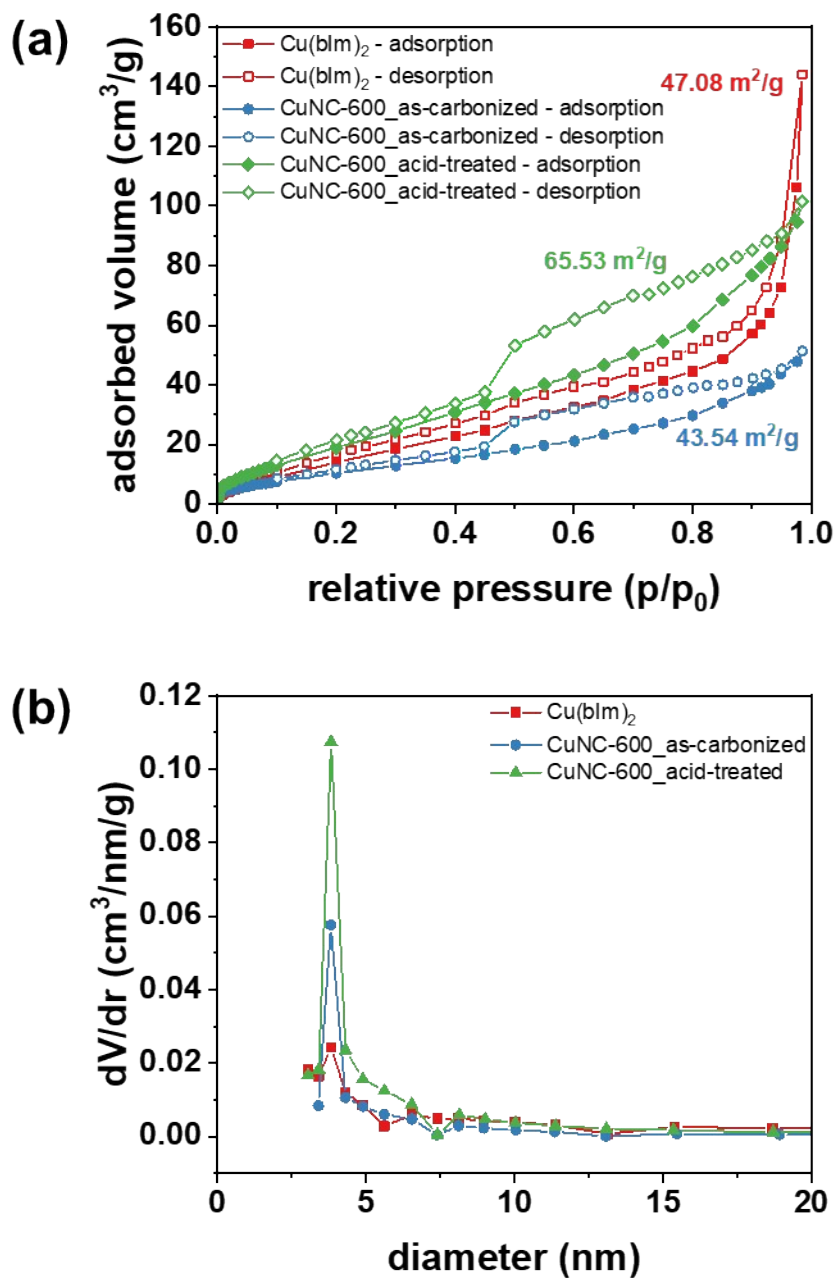

**Figure S3.** BET analyses of Cu(blm)<sub>2</sub>, as-carbonized and acid-treated CuNC-600. (a) N<sub>2</sub> isotherm at 77 K and (b) pore size distribution.

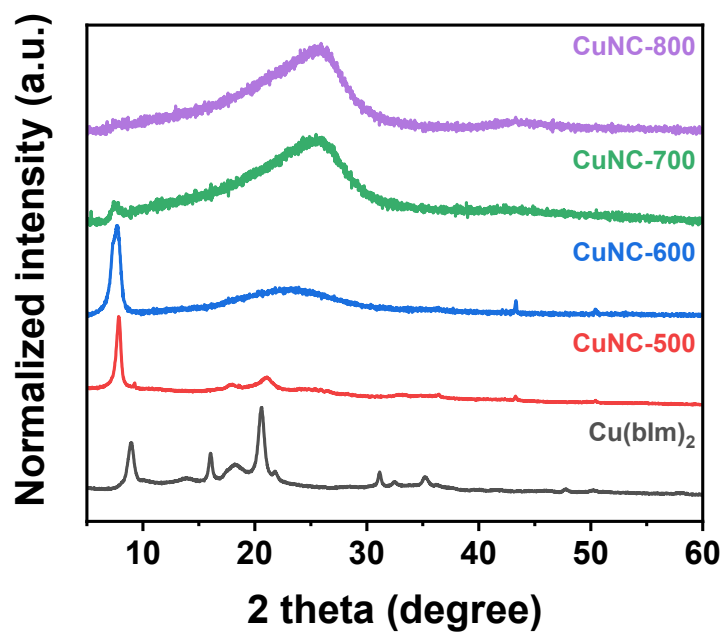

**Figure S4.** XRD patterns of Cu(bIm)<sub>2</sub> and CuNC catalysts carbonized at various temperatures.

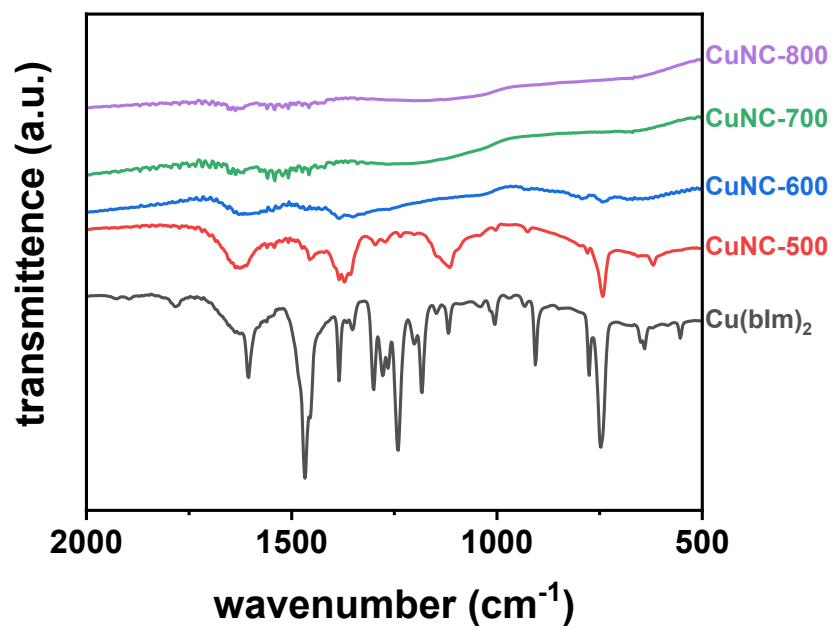

**Figure S5.** FT-IR spectra of Cu(bIm)<sub>2</sub> and CuNC catalysts carbonized at various temperatures.

**Table S1.** Wavenumbers and assignments of Raman and FT-IR peaks of Cu(bIm)<sub>2</sub>.

| FT-IR (cm <sup>-1</sup> ) | Raman (cm <sup>-1</sup> ) | Assignment                             |
|---------------------------|---------------------------|----------------------------------------|
| 554                       | 553                       | ring torsion                           |
|                           | 583                       |                                        |
| 640                       | 640                       | Imidazole ring torsion                 |
| 650                       |                           |                                        |
| 746                       |                           | benzimidazole C-H out-of-plane bending |
| 775                       | 776                       | Imidazole plane ring bending           |
| 907                       |                           | Benzimidazole in-plane ring bending    |
| 932                       |                           | Benzimidazole in-plane ring bending    |
| 970                       |                           | Imidazole C-H in-plane bending         |
| 1005                      |                           | Benzimidazole in-plane ring bending    |
| 1016                      |                           | Benzimidazole in-plane ring bending    |
| 1119                      |                           | benzimidazole C-H out-of-plane bending |
| 1148                      |                           | Benzimidazole in-plane C-H bending     |
| 1182                      |                           | Benzimidazole in-plane C-H bending     |
| 1202                      |                           | Benzimidazole in-plane C-H bending     |
| 1240                      | 1240                      | ring stretching                        |
| 1265                      | 1260                      | Benzimidazole in-plane bending         |
| 1279                      | 1275                      | Benzimidazole in-plane bending         |
| 1300                      | 1300                      | ring stretching                        |
| 1350                      | 1350                      | ring stretching                        |
| 1385                      |                           | ring stretching                        |
| 1468                      | 1466                      | ring stretching                        |
| 1605                      | 1609                      | ring stretching                        |

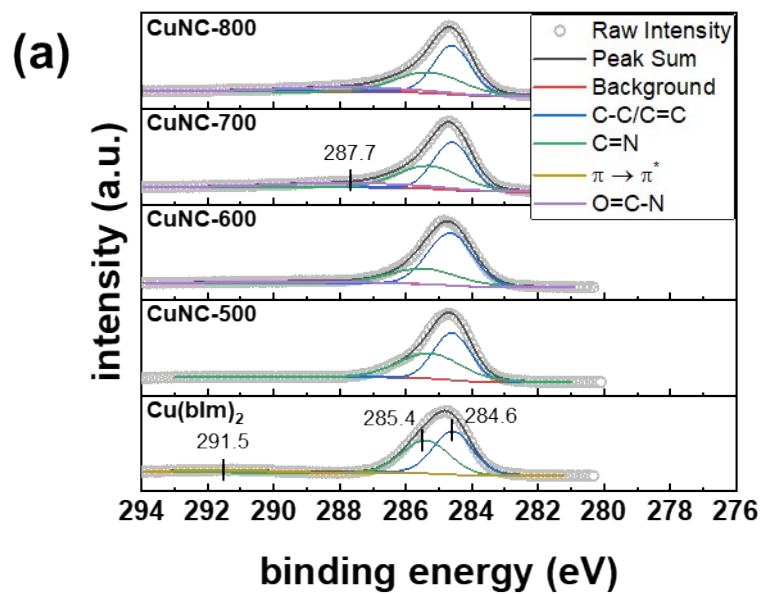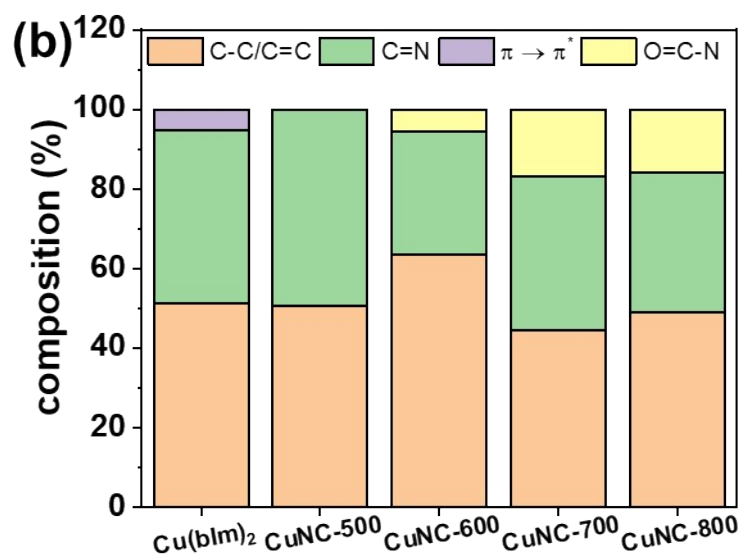

**Figure S6.** (a) High-resolution XPS C 1s spectra of Cu(blm)<sub>2</sub> and CuNC catalysts, and the corresponding compositions of carbon species.



**Table S2.** Element analysis results determined by XPS analysis.

|                            | Elements (wt%) |      |     |      | Sum |
|----------------------------|----------------|------|-----|------|-----|
|                            | C              | N    | O   | Cu   |     |
| <b>Cu(bIm)<sub>2</sub></b> | 55.7           | 17.2 | 1.9 | 25.2 | 100 |
| <b>CuNC-500</b>            | 61.0           | 14.6 | 5.8 | 18.6 | 100 |
| <b>CuNC-600</b>            | 61.1           | 14.9 | 6.3 | 17.7 | 100 |
| <b>CuNC-700</b>            | 64.8           | 13.5 | 8.9 | 12.8 | 100 |
| <b>CuNC-800</b>            | 69.4           | 10.6 | 9.0 | 11.0 | 100 |

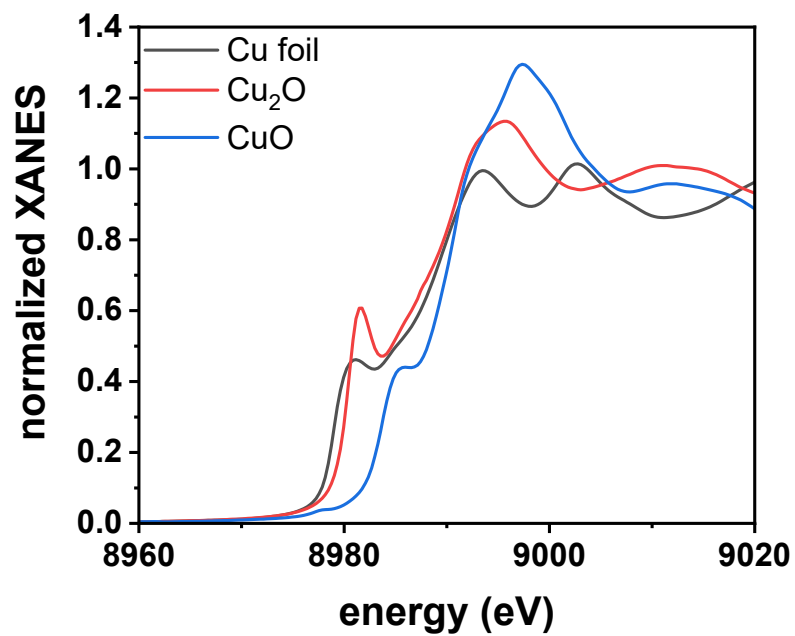

Figure S7. Cu-XANES spectra of Cu foil, Cu<sub>2</sub>O, CuO.

**Table S3.** Detailed Cu-EXAFS fitting results of Cu(bIm)<sub>2</sub> and CuNC catalysts.

| Catalyst                   | Path   | Coordination number <sup>a</sup> | Distance (Å)  | Debye-Waller Factor (Å <sup>2</sup> ) | R-Factor <sup>b</sup> |
|----------------------------|--------|----------------------------------|---------------|---------------------------------------|-----------------------|
| <b>Cu(bIm)<sub>2</sub></b> | Cu-N   | 4.22                             | 1.97 (±0.006) | 0.004 (±0.001)                        | 0.007                 |
|                            | Cu-C   | 8.44                             | 2.99 (±0.02)  | 0.009 (±0.002)                        |                       |
|                            | Cu-N-C | 16.88                            | 3.19 (±0.037) | 0.017 (±0.007)                        |                       |
| <b>CuNC-500</b>            | Cu-N   | 2.67                             | 1.87 (±0.012) | 0.005 (±0.002)                        | 0.019                 |
|                            | Cu-C   | 3                                | 2.92 (±0.029) | 0.004 (±0.003)                        |                       |
|                            | Cu-C   | 2.67                             | 3.18 (±0.046) | 0.009 (±0.008)                        |                       |
| <b>CuNC-600</b>            | Cu-N   | 2.77                             | 1.91 (±0.010) | 0.006 (±0.002)                        | 0.003                 |
|                            | Cu-C   | 1.84                             | 3.16 (±0.060) | 0.016 (±0.012)                        |                       |
|                            | Cu-Cu  | 0.07                             | 2.54 (±0.012) | 0.007 (±0.004)                        |                       |
| <b>CuNC-700</b>            | Cu-N   | 3.34                             | 1.93 (±0.022) | 0.008 (±0.003)                        | 0.014                 |
|                            | Cu-C   | 9.02                             | 3.00 (±0.093) | 0.020 (±0.016)                        |                       |
|                            | Cu-C-N | 18.9                             | 3.17 (±0.079) | 0.016 (±0.015)                        |                       |
|                            | Cu-Cu  | 0.35                             | 2.56 (±0.063) | 0.0077 (±0.0076)                      |                       |
| <b>CuNC-800</b>            | Cu-N   | 3.79                             | 1.95 (±0.014) | 0.006 (±0.002)                        | 0.019                 |
|                            | Cu-C   | 3.67                             | 3.05 (±0.055) | 0.010 (±0.008)                        |                       |
|                            | Cu-Cu  | 0.6                              | 2.54 (±0.020) | 0.003 (±0.002)                        |                       |
|                            | Cu-C   | 11                               | 3.40 (±0.039) | 0.018 (±0.005)                        |                       |

<sup>a</sup>The error was within 20%. <sup>b</sup>a measure of the mean square sum of the misfit at each data point. Fit range: 2 < k < 11 Å<sup>-1</sup>; 1 < R < 3 Å; Fit window: Hanning

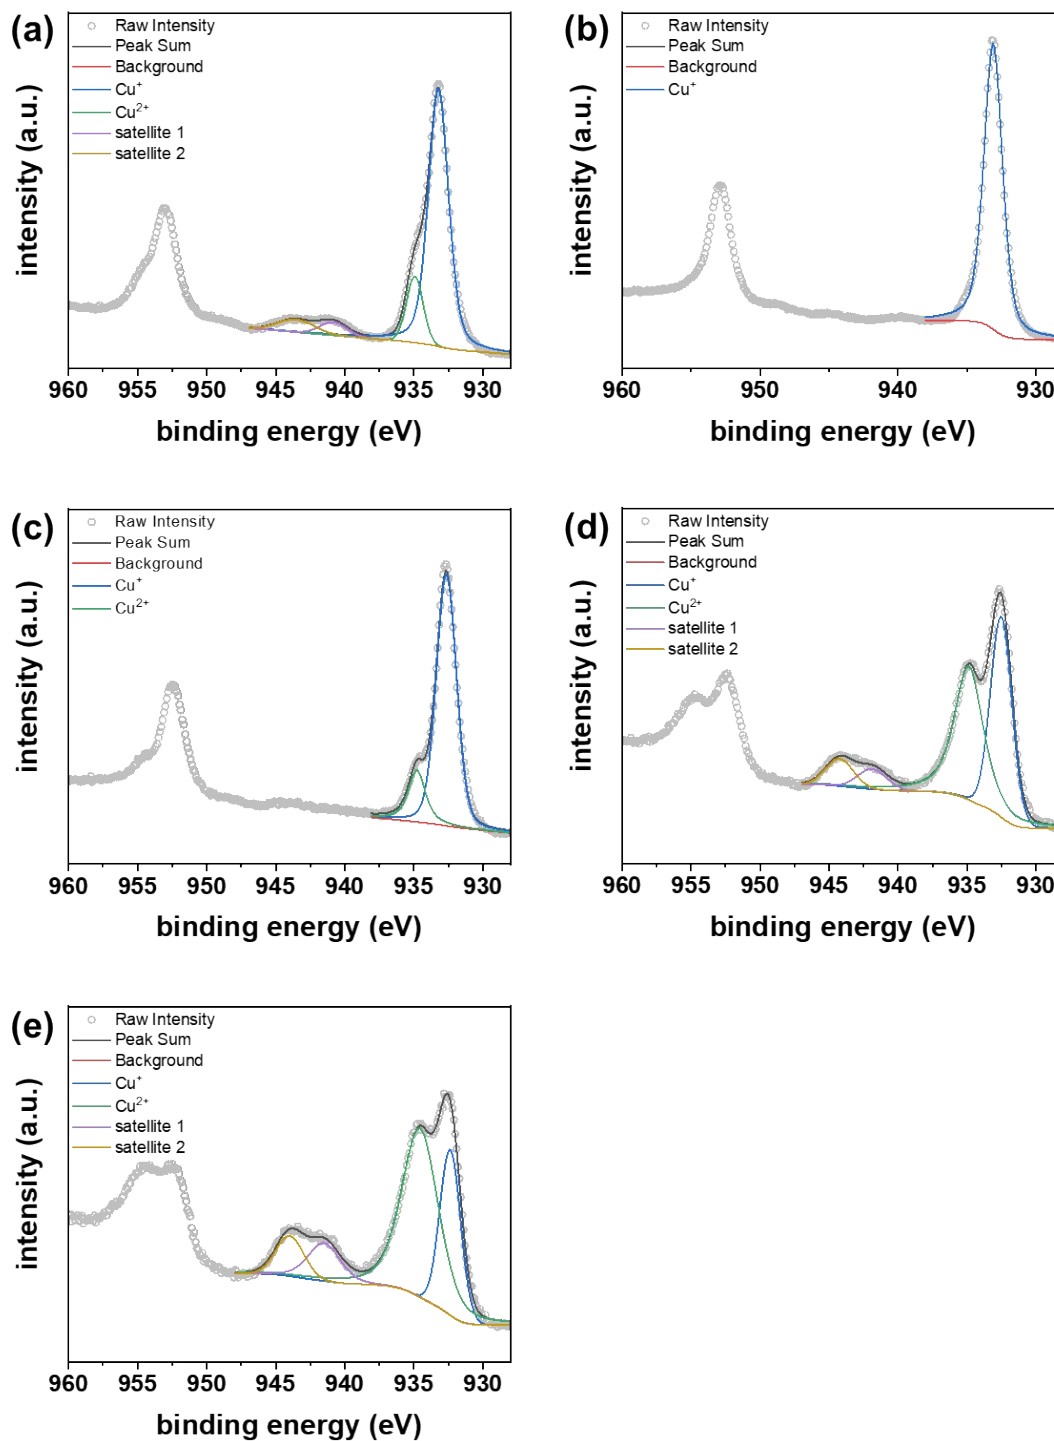

**Figure S8.** High-resolution Cu 2p XPS spectra of (a) Cu(blnc)<sub>2</sub>, (b-e) CuNC-500, -600, -700, and -800, respectively.

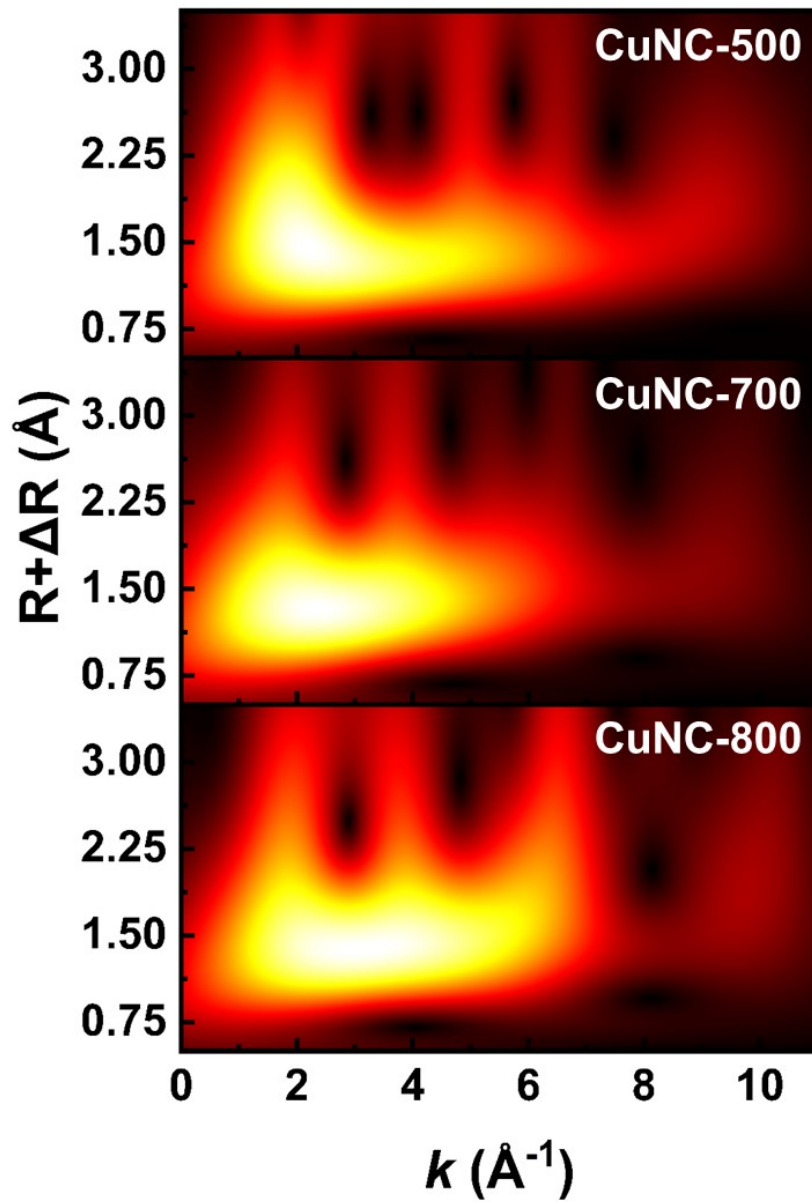

Figure S9. WT-EXAFS contour plots of CuNC-500, -700, and -800.

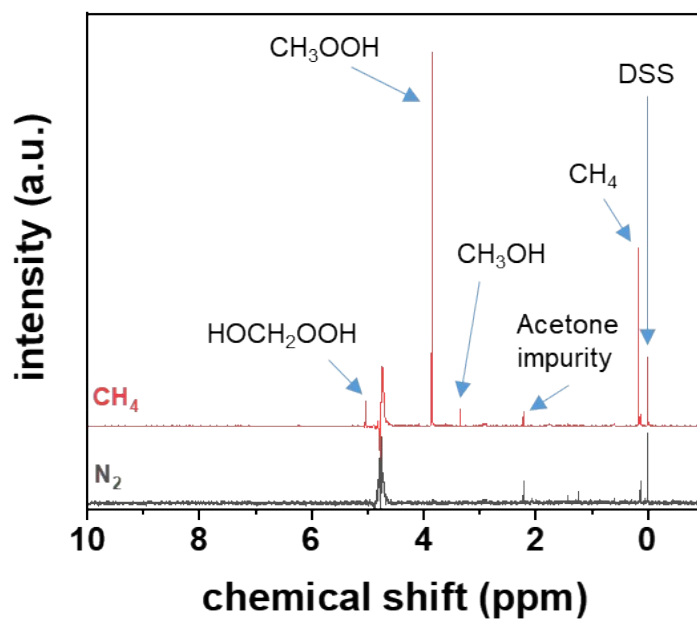

**Figure S10.** Typical <sup>1</sup>H-NMR spectra of the product solutions using (a) CH<sub>4</sub> and (b) N<sub>2</sub>.

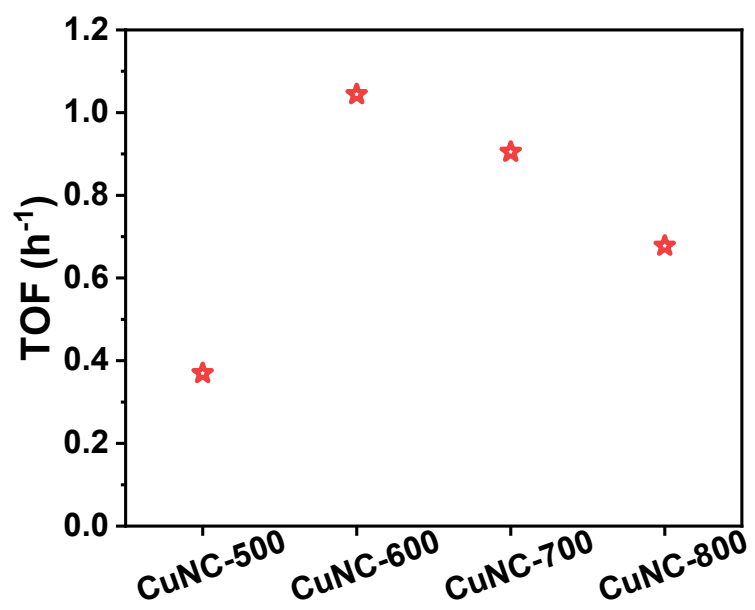

**Figure S11.** Turnover frequency (TOF) of C1 liquid products using  $\text{Cu}(\text{blm})_2$  and CuNC-T catalysts.

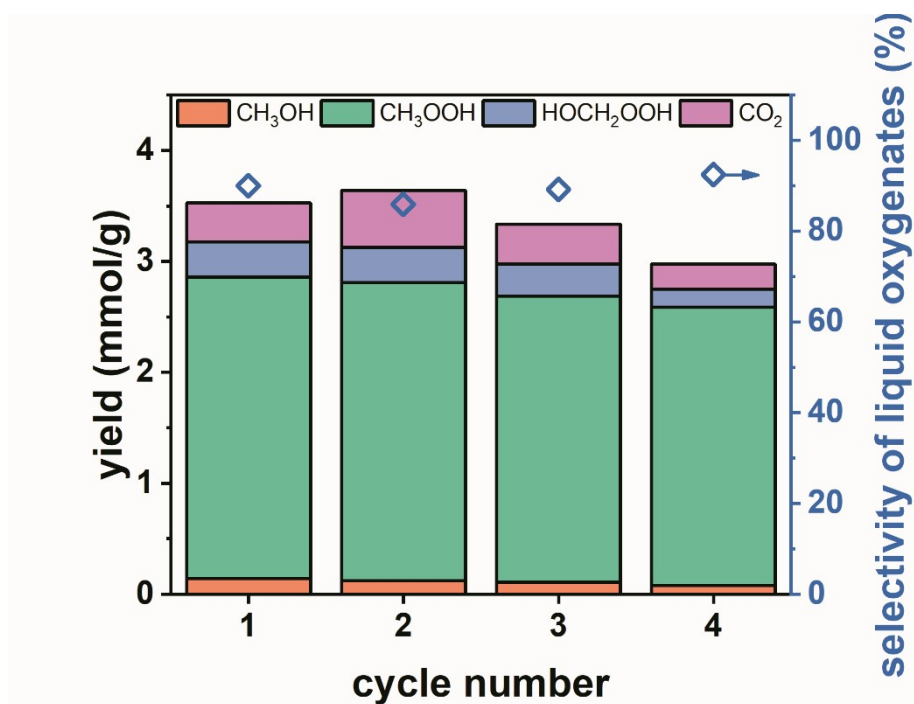

**Figure S12.** Reuse test of CuNC-600 catalyst. Reaction condition: initial amount of catalyst 5 mg, H<sub>2</sub>O 10 mL, reaction time = 0.5 h, 50 °C, [H<sub>2</sub>O<sub>2</sub>] = 0.5 M, CH<sub>4</sub> 28.5 bar, He 1.5 bar.



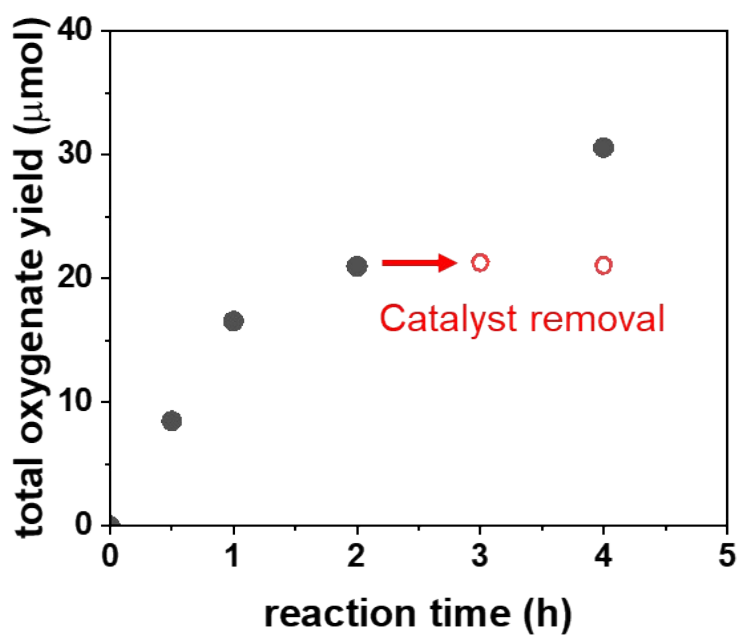

**Figure S13.** Hot filtration test result.

Reaction condition : CuNC-600 5 mg, H<sub>2</sub>O 10 mL, reaction time = 0.5 - 4 h. 40 °C, [H<sub>2</sub>O<sub>2</sub>] = 0.5 M, CH<sub>4</sub> 28.5 bar, He 1.5 bar.

The catalyst was separated from the reaction mixture through filtration after 2 hours, after which 1 mL of the liquid solution was collected for product quantification. Subsequently, the reaction vessel was replenished with methane gas up to 30 bar and the reaction continued for an additional hour. Another 1 mL liquid sample was taken, and the reaction proceeded for a further hour following a recharge of the reaction vessel with methane.

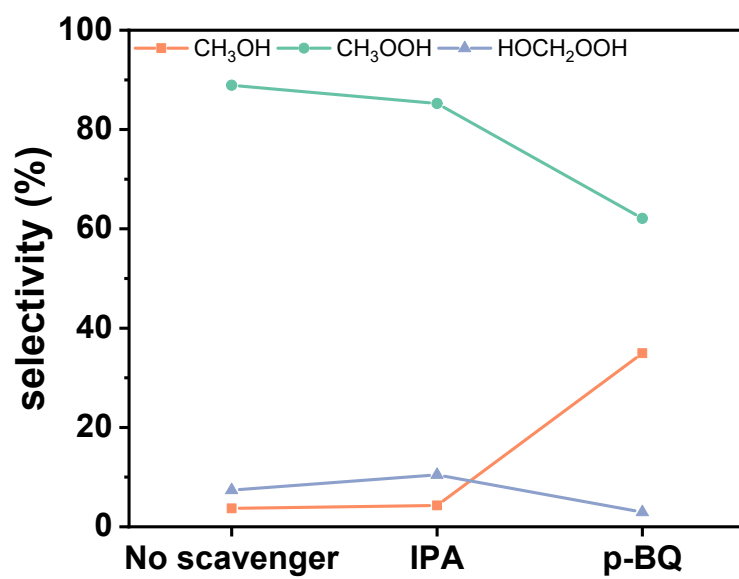

Figure S14. Liquid product selectivity during radical scavenger tests.

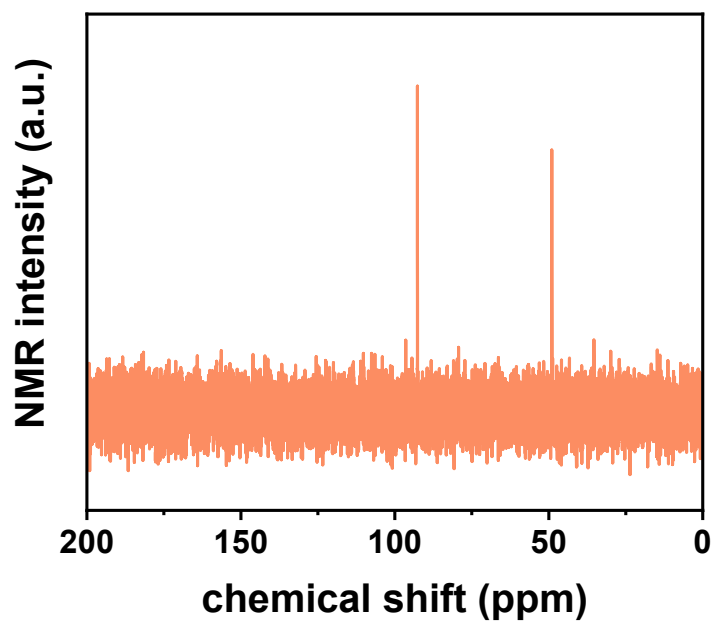

**Figure S15.** <sup>13</sup>C-NMR spectrum of the liquid product after the oxidation of <sup>13</sup>CH<sub>3</sub>OH.

Reaction condition: CuNC-600 5 mg, H<sub>2</sub>O<sub>2</sub> 5 mmol, H<sub>2</sub>O 10 mL, CH<sub>4</sub> 28.5 bar, He 1.5 bar, 40 °C, 1 h.

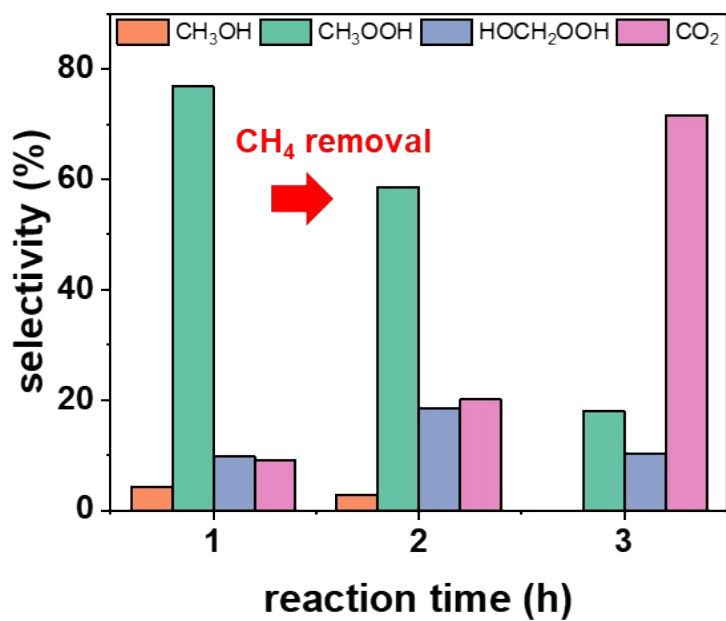

**Figure S16.** CH<sub>3</sub>OOH oxidation result. CH<sub>4</sub> was removed from the reaction vessel after 1 h of reaction under standard conditions. The vessel was re-pressurized to 30 bar with N<sub>2</sub> and the reaction was continued for another 1 and 2 hours.

**Table S4.** Performances comparison of the thermocatalysts for methane oxidation using H<sub>2</sub>O<sub>2</sub>.

| Catalytic template | Catalyst                                       | Metal-loading (wt%) | Active site structure          | P <sup>a</sup> (bar) | T <sup>b</sup> (°C) | Productivity [ $\mu\text{mol} / \text{g}_{\text{cat}} / \text{h}$ ] |                     |                       |          |                 | C1 liquid product selectivity (%) | Turnover Frequency ( $\text{mol}_{\text{C1 liquid products}} / \text{mol}_{\text{metal}} / \text{h}$ ) | Ref.             |
|--------------------|------------------------------------------------|---------------------|--------------------------------|----------------------|---------------------|---------------------------------------------------------------------|---------------------|-----------------------|----------|-----------------|-----------------------------------|--------------------------------------------------------------------------------------------------------|------------------|
|                    |                                                |                     |                                |                      |                     | CH <sub>3</sub> OH                                                  | CH <sub>3</sub> OOH | HOCH <sub>2</sub> OOH | HCOOH    | CO <sub>2</sub> |                                   |                                                                                                        |                  |
| <b>Carbon</b>      | <b>CuNC-600</b>                                | <b>17.7</b>         | <b>CuN3</b>                    | <b>30</b>            | <b>50</b>           | <b>285</b>                                                          | <b>5429</b>         | <b>633</b>            | <b>0</b> | <b>766</b>      | <b>89.2</b>                       | <b>2.3</b>                                                                                             | <b>This work</b> |
|                    | FeN4/GN                                        | 2.7                 | FeN4                           | 20                   | 25                  | 11                                                                  | 83                  | 63                    | 71       | 31              | 88.1                              | 0.34                                                                                                   | [S1]             |
|                    | Cu <sub>1</sub> @C <sub>3</sub> N <sub>4</sub> | 0.35                | CuN2                           | 30                   | 50                  | 26                                                                  |                     | 0                     | 0        | -               | -                                 | 0.7                                                                                                    | [S2]             |
|                    | Cu <sub>2</sub> @C <sub>3</sub> N <sub>4</sub> | 0.35                | Cu2O-N4                        | 30                   | 50                  | 260                                                                 |                     | 0                     | 0        | 16              | 89.4                              | 4.73                                                                                                   |                  |
| <b>Metal Oxide</b> | AuPd/TiO <sub>2</sub> (1 wt%)                  | 1                   | AuPd                           | 30.5                 | 50                  | 76                                                                  | 146                 | 0                     | 0        | 30              | 88.1                              | 3.4                                                                                                    | [S3]             |
|                    | Rh/ZrO <sub>2</sub>                            | 0.3                 | Rh <sub>1</sub> O <sub>5</sub> | 30                   | 70                  | 31                                                                  | 7                   | 0                     | 0        | 10              | 78                                | 1.7                                                                                                    | [S4]             |
|                    | CuCHA                                          | 2.5                 | -                              | 35                   | 60                  | 13                                                                  | 101                 | -                     | -        | -               | -                                 | 0.3                                                                                                    | [S5]             |
|                    | CuFAU                                          | 1.1                 | -                              | 35                   | 60                  | 13                                                                  | 224                 | -                     | -        | -               | -                                 | 1.3                                                                                                    |                  |
|                    | CuMOR                                          | 0.4                 | -                              | 35                   | 60                  | 6                                                                   | 98                  | -                     | -        | -               | -                                 | 1.6                                                                                                    |                  |
|                    | CuFER                                          | 2.3                 | -                              | 35                   | 60                  | 104                                                                 | 85                  | -                     | -        | -               | -                                 | 0.4                                                                                                    |                  |
| CuBEA              | 1.1                                            | -                   | 35                             | 60                   | 6                   | 126                                                                 | -                   | -                     | -        | -               | 0.7                               |                                                                                                        |                  |

<sup>a</sup>Pressure;<sup>b</sup>Temperature.

**Table S5.** Carbon balance of the reactant and products with time.

| t <sup>a</sup> (h) | CH <sub>4</sub> consumption (μmol) | Products (μmol)    |                     |                       |                 | Carbon balance <sup>b</sup> (%) |
|--------------------|------------------------------------|--------------------|---------------------|-----------------------|-----------------|---------------------------------|
|                    |                                    | CH <sub>3</sub> OH | CH <sub>3</sub> OOH | HOCH <sub>2</sub> OOH | CO <sub>2</sub> |                                 |
| 0.5                | 8.44                               | 0.27               | 6.46                | 0.54                  | 1.21            | 100.5                           |
| 1                  | 14.85                              | 0.44               | 11.33               | 1.19                  | 2.32            | 102.9                           |
| 2                  | 19.83                              | 0.74               | 15.22               | 1.69                  | 3.16            | 105.0                           |
| 4                  | 30.26                              | 0.77               | 20.87               | 3.61                  | 5.34            | 101.1                           |
| 10                 | 38.42                              | 1.03               | 15.65               | 2.46                  | 20.23           | 102.5                           |
| 16                 | 47.53                              | 1.59               | 16.50               | 2.69                  | 25.65           | 97.7                            |

<sup>a</sup>Reaction time; <sup>b</sup>Carbon balance = Total yield of the products / CH<sub>4</sub> consumption \* 100 %.

**Table S6.** Reaction rate equations of the proposed reaction equations.

| No. | Reaction rate equation                                                 | Initial condition              |
|-----|------------------------------------------------------------------------|--------------------------------|
| 1   | $\frac{d[CH_4]}{dt} = -k_1[CH_4][H_2O_2] - k_2[CH_4][H_2O_2]^2$        | $[CH_4]_0 = 33.8 \text{ mM}^a$ |
| 2   | $\frac{d[CH_3OH]}{dt} = k_1[CH_4][H_2O_2] - k_3[CH_3OH][H_2O_2]$       | $[CH_3OH]_0 = 0 \text{ mM}$    |
| 3   | $\frac{d[CH_3OOH]}{dt} = k_2[CH_4][H_2O_2]^2 - k_4[CH_3OOH][H_2O_2]$   | $[CH_3OOH]_0 = 0 \text{ mM}$   |
| 4   | $\frac{d[HOCH_2OOH]}{dt} = k_3[CH_3OH][H_2O_2] + k_4[CH_3OOH][H_2O_2]$ | $[HOCH_2OOH]_0 = 0 \text{ mM}$ |
| 5   | $\frac{d[CO_2]}{dt} = k_5[CH_3OOH][H_2O_2] + k_6[HOCH_2OOH][H_2O_2]$   | $[CO_2]_0 = 0 \text{ mM}$      |

<sup>a</sup>The initial methane concentration was calculated by the interpolation of experimental data provided in the literature.<sup>S6</sup>

**Table S7.** Best fit results of the reaction rate constants.

| Reaction rate constants                  |           |
|------------------------------------------|-----------|
| $k_1$ [M <sup>-1</sup> h <sup>-1</sup> ] | 0.0015755 |
| $k_2$ [M <sup>-2</sup> h <sup>-1</sup> ] | 0.1510500 |
| $k_3$ [M <sup>-2</sup> h <sup>-1</sup> ] | 0.0000241 |
| $k_4$ [M <sup>-1</sup> h <sup>-1</sup> ] | 0.5423146 |
| $k_5$ [M <sup>-2</sup> h <sup>-1</sup> ] | 0.0000002 |
| $k_6$ [M <sup>-1</sup> h <sup>-1</sup> ] | 3.015652  |



## References

[S1] Xiaoju Cui, Haobo Li, Yan Wang, Yuanli Hu, Lei Hua, Haiyang Li, Xiuwen Han, Qingfei Liu, Fan Yang, Limin He, Xiaoqi Chen, Qingyun Li, Jianping Xiao, Dehui Deng, and Xinhe Bao, *Chem* **2018**, 4, 1902–1910.

[S2] Pengfei Xie, Jing Ding, Zihao Yao, Tiancheng Pu, Peng Zhang, Zhennan Huang, Canhui Wang, Junlei Zhang, Noah Zecher-Freeman, Han Zong, Dashui Yuan, Shengwei Deng, Reza Shahbazian-Yassar and Chao Wang, *Nat. Commun.* **2022**, 13, 1375.

[S3] Christopher Williams, James H. Carter, Nicholas F. Dummer, Y. Kit Chow, David J. Morgan, Sara Yacob, Pedro Serna, David J. Willock, Randall J. Meyer, Stuart H. Taylor, and Graham J. Hutchings, *ACS Catal.* **2018**, 8, 3, 2567–2576.

[S4] Yongwoo Kwon, Tae Yong Kim, Gihun Kwon, Jongheop Yi, and Hyunjoo Lee, *J. Am. Chem. Soc.* **2017**, 139, 17694–17699.

[S5] Junya Ohyama, Airi Hirayama, Nahoko Kondou, Hiroshi Yoshida, Masato Machida, Shun Nishimura, Kenji Hirai, Itsuki Miyazato and Keisuke Takahashi, *Scientific Reports* **2021**, 11, 2067.

[S6] Jörn Kiepe, Sven Horstmann, Kai Fischer, and Jürgen Gmehling, *Ind. Eng. Chem. Res.* **2003**, 42, 21, 5392–5398
